# Supplementary material for: Multiplexed Assembly and Annotation of Synthetic Biology Constructs Using Long-Read Nanopore Sequencing
Source: PubMed Central journal article supplement — ACS Synth Biol. 2022 Jun 13;11(7):2238–46. doi: 10.1021/acssynbio.2c00126 (PMC9295152; doi:10.1021/acssynbio.2c00126), 2022-06-13
Supplement: sb2c00126_si_001.pdf [file sb2c00126_si_001.pdf]

## Supporting Information

### **Multiplexed assembly and annotation of synthetic biology constructs using long-read Nanopore sequencing**

Francesco E. Emiliani<sup>1,\*</sup>, Ian Hsu<sup>1</sup>, and Aaron McKenna<sup>1,2,\*</sup>

<sup>1</sup> Department of Molecular and Systems Biology, Geisel School of Medicine, Dartmouth College, Lebanon, NH 03756, USA

<sup>2</sup> Norris Cotton Cancer Center, Dartmouth-Hitchcock Medical Center, Lebanon, NH 03756, USA

\* Correspondence: Francesco.E.Emiliani.GR@Dartmouth.edu, McKenna.Aaron@gmail.com

This file contains:

Supporting figures 1-4

Supporting tables 1-5

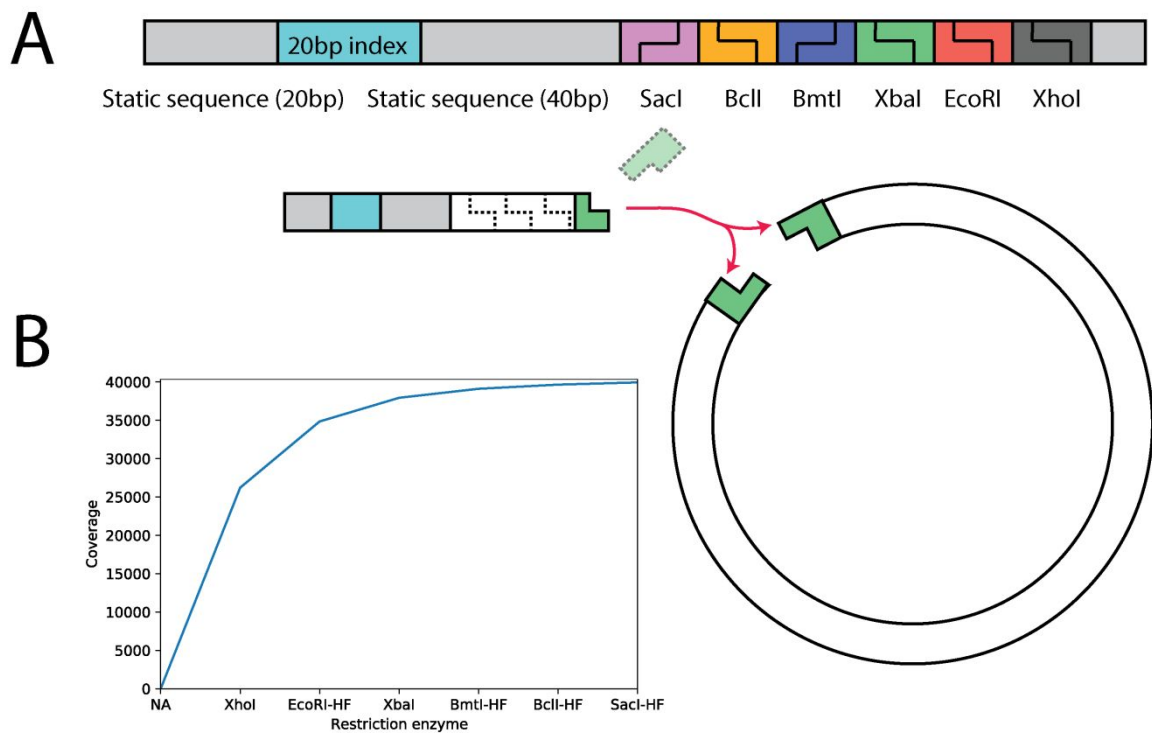

**Figure S1. (A).** Barcode ligation requires a single, known restriction site (**green**) for each plasmid that is shared with the ligation adapters. Using a set-cover approach, we searched all known plasmids in the Addgene database to establish a candidate list of restriction enzymes that cut once and only once per plasmid (**see methods**). From this search, we selected a set of 6 restriction enzymes and incorporated their restriction sites into individual barcodes for ligation. **(B)** These restriction enzymes covered a total of 62% of the 63,017 Addgene plasmids with a single restriction site. The resulting barcode sequences can then be ligated onto plasmids that are cut with the matching enzyme (**methods**).

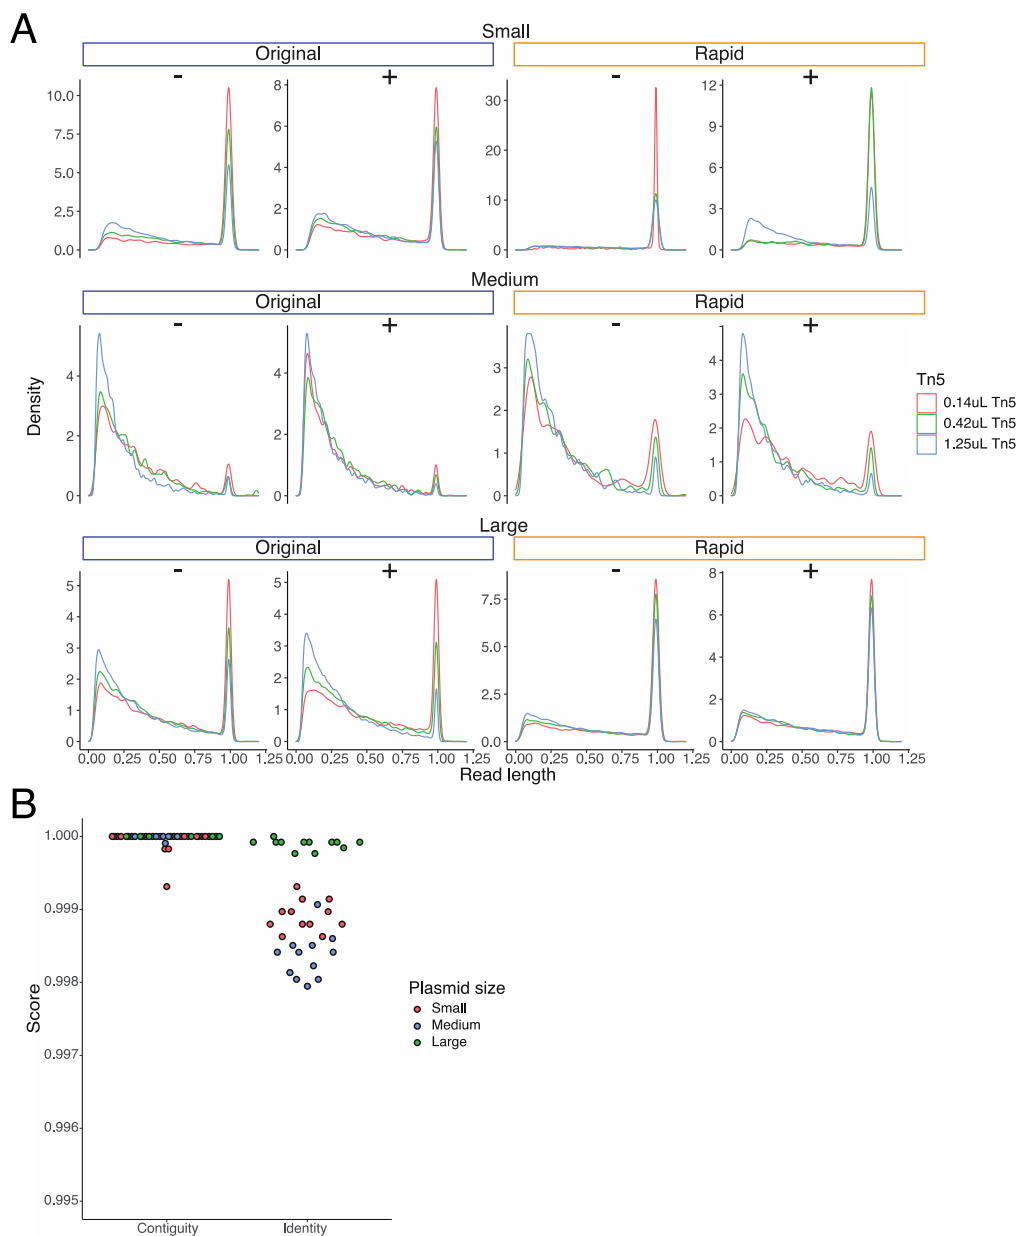

**Figure S2. (A).** To determine conditions that would maximize read length, we processed three plasmids of various lengths (6kbp to 13kbp) using a modified pipeline. Density plots of read lengths, normalized to the plasmid length, are shown for small, medium, and large plasmids (top to bottom rows), amount of Tn5 (colors), the duration of tagmentation (left and right), as well as method for Tn5 inactivation (- for SDS only, + for SDS with heat inactivation). **(B).** Once the reads from each of the conditions were assembled, we calculated contiguity and identity scores for each assembly. Identity scores cluster by plasmid type due to sequence complexity and are unrelated to reaction conditions.

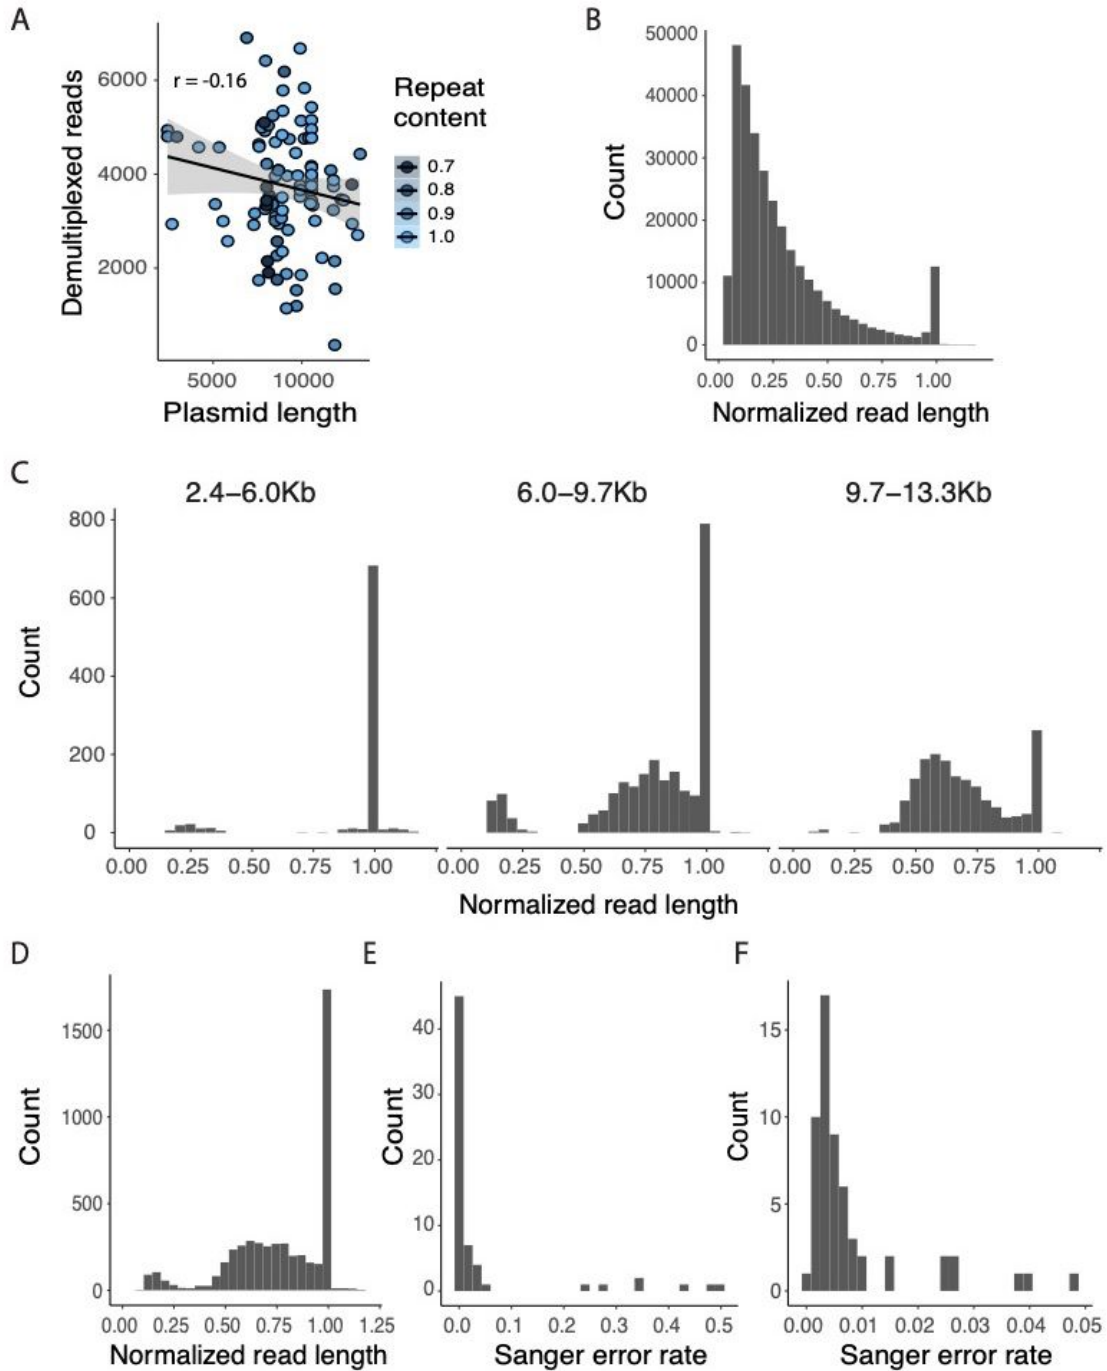

**Figure S3.** (A). The correlation of recovered Nanopore sequencing read counts to input plasmid length, where point color indicates the relative repeat content of the input plasmid. (B) Histogram of unfiltered Nanopore read lengths normalized to the originating plasmid sequence length. (C) Post-filtering and normalized read lengths across ranges of plasmid lengths and (D) all plasmid lengths. (E) Error rates for all 64 Sanger sequencing trace files after quality control and (F) after removing 7 traces with error rates over 10%.

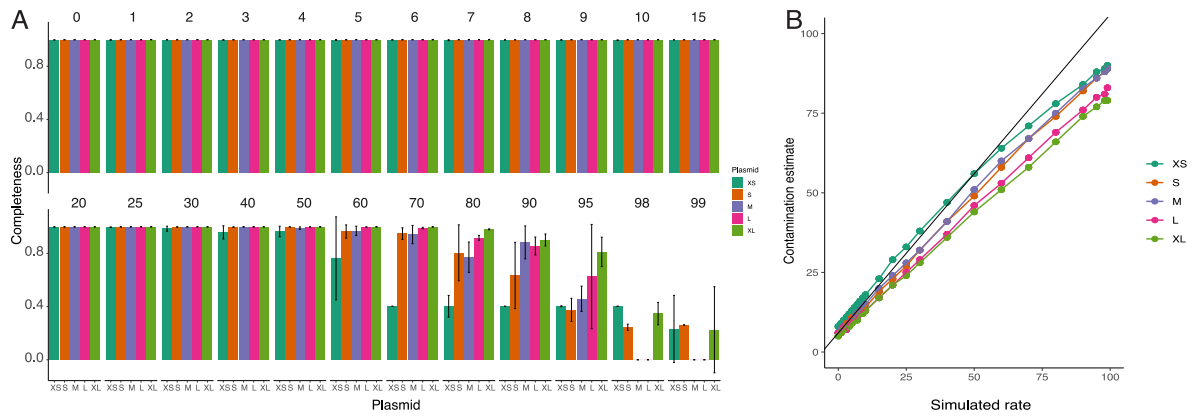

**Figure S4. (A)** Plasmid assembly completeness from simulated reads. Each of five plasmids (XS=extra small, S=small, M=medium, L=large, XL=extra-large) were mixed with randomly sampled reads from the remaining 91 plasmids at contamination levels from 0% to 99%. Assembly issues in the smaller plasmids started at 30-40% contaminated, with most assemblies having serious issues at contamination levels greater than 80%. **(B)** Contamination estimates when reads are mapped against the known plasmid map instead of the assembled reference as in figure 3. Here contamination estimates better track simulated rates to the upper limits of contamination.

**Table S1.** Primer and barcode sequences for the Tn5 V1 approach.

| <b>Name</b>     | <b>Sequence</b>                               |
|-----------------|-----------------------------------------------|
| NanP_tn5_v1_001 | ATCGTAGCAACAACAACAACAACCGAGATGTGTATAAGAGACAG  |
| NanP_tn5_v1_002 | ATCGTAGCAACAGAACAATGGATGGAGATGTGTATAAGAGACAG  |
| NanP_tn5_v1_003 | ATCGTAGCAACCGACTACGTGATTCAGATGTGTATAAGAGACAG  |
| NanP_tn5_v1_004 | ATCGTAGCAACGCCAATTATCGAGCAGATGTGTATAAGAGACAG  |
| NanP_tn5_v1_005 | ATCGTAGCAACTCTGCCAAGGACAAAGATGTGTATAAGAGACAG  |
| NanP_tn5_v1_006 | ATCGTAGCAAGACGAATTGGACGAGAGATGTGTATAAGAGACAG  |
| NanP_tn5_v1_007 | ATCGTAGCAAGCCTAACTAATCCGGAGATGTGTATAAGAGACAG  |
| NanP_tn5_v1_008 | ATCGTAGCAAGGTTGACACTCTGGAAGATGTGTATAAGAGACAG  |
| NanP_tn5_v1_009 | ATCGTAGCAATAAGTCTCCTAGTCGAGATGTGTATAAGAGACAG  |
| NanP_tn5_v1_010 | ATCGTAGCAATCCTTGACCTCGCCAAGATGTGTATAAGAGACAG  |
| NanP_tn5_v1_011 | ATCGTAGCAATTAGTGCTCTCATGGAGATGTGTATAAGAGACAG  |
| NanP_tn5_v1_012 | ATCGTAGCACAAGCTAAGGATACCAAGATGTGTATAAGAGACAG  |
| NanP_tn5_v1_013 | ATCGTAGCACACTCGCCGGTCTAAAGATGTGTATAAGAGACAG   |
| NanP_tn5_v1_014 | ATCGTAGCACATGAATCTTACGGAGATGTGTATAAGAGACAG    |
| NanP_tn5_v1_015 | ATCGTAGCACCATTACGTCATTCCAGATGTGTATAAGAGACAG   |
| NanP_tn5_v1_016 | ATCGTAGCACCTAATAAACACTCTCCAGATGTGTATAAGAGACAG |
| NanP_tn5_v1_017 | ATCGTAGCACGACGAGCTTGGAGGTAGATGTGTATAAGAGACAG  |
| NanP_tn5_v1_018 | ATCGTAGCACGCTCCTTATCGAACCCAGATGTGTATAAGAGACAG |
| NanP_tn5_v1_019 | ATCGTAGCACGTGCGACAAGCCTCTAGATGTGTATAAGAGACAG  |
| NanP_tn5_v1_020 | ATCGTAGCACTCCAGGTATGTATTCAGATGTGTATAAGAGACAG  |
| NanP_tn5_v1_021 | ATCGTAGCACTTATACGACCACTTCAGATGTGTATAAGAGACAG  |
| NanP_tn5_v1_022 | ATCGTAGCAGAATAACCTCGGATACAGATGTGTATAAGAGACAG  |
| NanP_tn5_v1_023 | ATCGTAGCAGAGGAACGAGAATGTGAGATGTGTATAAGAGACAG  |
| NanP_tn5_v1_024 | ATCGTAGCAGCATATTGTAGACTGGAGATGTGTATAAGAGACAG  |
| NanP_tn5_v1_025 | ATCGTAGCAGCGGTTCTCATATAAGAGATGTGTATAAGAGACAG  |
| NanP_tn5_v1_026 | ATCGTAGCAGGAGCTTATATGTGGTAGATGTGTATAAGAGACAG  |
| NanP_tn5_v1_027 | ATCGTAGCAGGTTGTAGGTGTAGTAAGATGTGTATAAGAGACAG  |
| NanP_tn5_v1_028 | ATCGTAGCAGTCTCTAGCTCAATACAGATGTGTATAAGAGACAG  |
| NanP_tn5_v1_029 | ATCGTAGCAGTTGGTATTCTTAAGCAGATGTGTATAAGAGACAG  |
| NanP_tn5_v1_030 | ATCGTAGCATACTTAGGATGTGCCGAGATGTGTATAAGAGACAG  |
| NanP_tn5_v1_031 | ATCGTAGCATCAGGTATCGCTCCGAGATGTGTATAAGAGACAG   |
| NanP_tn5_v1_032 | ATCGTAGCATCTATTCTTCGCTTGGAGATGTGTATAAGAGACAG  |
| NanP_tn5_v1_033 | ATCGTAGCATGCTAGTCGGAACGCCAGATGTGTATAAGAGACAG  |
| NanP_tn5_v1_034 | ATCGTAGCATTAGTGCCAACAGAGCAGATGTGTATAAGAGACAG  |
| NanP_tn5_v1_035 | ATCGTAGCATTGTGGAAGGTTGAGCAGATGTGTATAAGAGACAG  |
| NanP_tn5_v1_036 | ATCGTAGCCAAGATGGAGCCTAACTAGATGTGTATAAGAGACAG  |
| NanP_tn5_v1_037 | ATCGTAGCCAATGTCCAGCACTCCTAGATGTGTATAAGAGACAG  |
| NanP_tn5_v1_038 | ATCGTAGCCACCTCAATATAAGCCAAGATGTGTATAAGAGACAG  |
| NanP_tn5_v1_039 | ATCGTAGCCACTGTTAAGCGGTAGGAGATGTGTATAAGAGACAG  |
| NanP_tn5_v1_040 | ATCGTAGCCAGCGTTCACACTCGTAGATGTGTATAAGAGACAG   |
| NanP_tn5_v1_041 | ATCGTAGCCATAACGTCCTGTAGTAAGATGTGTATAAGAGACAG  |
| NanP_tn5_v1_042 | ATCGTAGCCATGCACCAATAGTAGCAGATGTGTATAAGAGACAG  |

NanP\_tn5\_v1\_043 ATCGTAGCCCAAGAAGGTCGTGCTGAGATGTGTATAAGAGACAG  
NanP\_tn5\_v1\_044 ATCGTAGCCCCTGCTCACTAACGGAGATGTGTATAAGAGACAG  
NanP\_tn5\_v1\_045 ATCGTAGCCCATTAAGCAGGTGTGTAGATGTGTATAAGAGACAG  
NanP\_tn5\_v1\_046 ATCGTAGCCCGCACTTGGAGAGCTTAGATGTGTATAAGAGACAG  
NanP\_tn5\_v1\_047 ATCGTAGCCCGGTGGTATCAATTAAGATGTGTATAAGAGACAG  
NanP\_tn5\_v1\_048 ATCGTAGCCCTACTGCCACTCGCTAAGATGTGTATAAGAGACAG  
NanP\_tn5\_v1\_049 ATCGTAGCCCTCTTAGTCTCCGCTCAGATGTGTATAAGAGACAG  
NanP\_tn5\_v1\_050 ATCGTAGCCGAACCACTCAACAGCGAGATGTGTATAAGAGACAG  
NanP\_tn5\_v1\_051 ATCGTAGCCGAGACAACGACACTAAAGATGTGTATAAGAGACAG  
NanP\_tn5\_v1\_052 ATCGTAGCCGCAATTATCGGACAGGAGATGTGTATAAGAGACAG  
NanP\_tn5\_v1\_053 ATCGTAGCCGCGAATAAGAAGTCATAGATGTGTATAAGAGACAG  
NanP\_tn5\_v1\_054 ATCGTAGCCGGACGTTACACAGAATAGATGTGTATAAGAGACAG  
NanP\_tn5\_v1\_055 ATCGTAGCCGTAAGTACGGAAGGTATAGATGTGTATAAGAGACAG  
NanP\_tn5\_v1\_056 ATCGTAGCCGTGCCAAGGAATGAACAGATGTGTATAAGAGACAG  
NanP\_tn5\_v1\_057 ATCGTAGCCTAATCACATGGAATCGAGATGTGTATAAGAGACAG  
NanP\_tn5\_v1\_058 ATCGTAGCCTATACTTAACGAGAGGAGATGTGTATAAGAGACAG  
NanP\_tn5\_v1\_059 ATCGTAGCCTCCGCGATTGTACCTCAGATGTGTATAAGAGACAG  
NanP\_tn5\_v1\_060 ATCGTAGCCTCTTGTTATCGCTAGAGATGTGTATAAGAGACAG  
NanP\_tn5\_v1\_061 ATCGTAGCCTGTAAGTGTCAAGCTAAGATGTGTATAAGAGACAG  
NanP\_tn5\_v1\_062 ATCGTAGCCTTCCGCGCTACGTTCTAGATGTGTATAAGAGACAG  
NanP\_tn5\_v1\_063 ATCGTAGCGAACGTCTGATGCCGCTAGATGTGTATAAGAGACAG  
NanP\_tn5\_v1\_064 ATCGTAGCGAATGAACTACCAATCCAGATGTGTATAAGAGACAG  
NanP\_tn5\_v1\_065 ATCGTAGCGACGCCTAACGGTGGAAAGATGTGTATAAGAGACAG  
NanP\_tn5\_v1\_066 ATCGTAGCGAGATTCAGATGCTTCCAGATGTGTATAAGAGACAG  
NanP\_tn5\_v1\_067 ATCGTAGCGAGTGTGGTAAGCATTCCAGATGTGTATAAGAGACAG  
NanP\_tn5\_v1\_068 ATCGTAGCGATGCAACCACCTCGGAAGATGTGTATAAGAGACAG  
NanP\_tn5\_v1\_069 ATCGTAGCGCACCACAGTATCGTCCAGATGTGTATAAGAGACAG  
NanP\_tn5\_v1\_070 ATCGTAGCGCCAATATGTAGACCAAAGATGTGTATAAGAGACAG  
NanP\_tn5\_v1\_071 ATCGTAGCGCCTCCGTAACATTCAAAGATGTGTATAAGAGACAG  
NanP\_tn5\_v1\_072 ATCGTAGCGCGCTGCTTATGGTGGAAAGATGTGTATAAGAGACAG  
NanP\_tn5\_v1\_073 ATCGTAGCGCTCATCGGAATCTAGGAGATGTGTATAAGAGACAG  
NanP\_tn5\_v1\_074 ATCGTAGCGGAACATACGCATAGCTAGATGTGTATAAGAGACAG  
NanP\_tn5\_v1\_075 ATCGTAGCGGACTTAATAGGACGTGAGATGTGTATAAGAGACAG  
NanP\_tn5\_v1\_076 ATCGTAGCGGTAAGGTAGCGACGACAGATGTGTATAAGAGACAG  
NanP\_tn5\_v1\_077 ATCGTAGCGGTCTAACAGGTCCGGTAGATGTGTATAAGAGACAG  
NanP\_tn5\_v1\_078 ATCGTAGCGGTTGCCCTCCACTATGAAGATGTGTATAAGAGACAG  
NanP\_tn5\_v1\_079 ATCGTAGCGTAGAGGAATGCGATGAAGATGTGTATAAGAGACAG  
NanP\_tn5\_v1\_080 ATCGTAGCGTCAGGAGTGTGCTTGGAGATGTGTATAAGAGACAG  
NanP\_tn5\_v1\_081 ATCGTAGCGTCTAGTTAAGCCTGGAAGATGTGTATAAGAGACAG  
NanP\_tn5\_v1\_082 ATCGTAGCGTGCTGTCAATCGCCGTAGATGTGTATAAGAGACAG  
NanP\_tn5\_v1\_083 ATCGTAGCGTTATACAGGATCGGTCAGATGTGTATAAGAGACAG  
NanP\_tn5\_v1\_084 ATCGTAGCTAACGAGGTAGAGCAGAAGATGTGTATAAGAGACAG  
NanP\_tn5\_v1\_085 ATCGTAGCTACAGCTTAATGCGCCGAGATGTGTATAAGAGACAG  
NanP\_tn5\_v1\_086 ATCGTAGCTAGACGCAGGTAATCCGAGATGTGTATAAGAGACAG  
NanP\_tn5\_v1\_087 ATCGTAGCTAGTTCAAGCCTGTCGGAGATGTGTATAAGAGACAG  
NanP\_tn5\_v1\_088 ATCGTAGCTATTCACGCAGTAGTTCAGATGTGTATAAGAGACAG  
NanP\_tn5\_v1\_089 ATCGTAGCTCAGTGTTCGTTGTTACAGATGTGTATAAGAGACAG  
NanP\_tn5\_v1\_090 ATCGTAGCTCCGTGCTAGACCGATGAGATGTGTATAAGAGACAG  
NanP\_tn5\_v1\_091 ATCGTAGCTCGCGTCCGAGGTGTATAGATGTGTATAAGAGACAG  
NanP\_tn5\_v1\_092 ATCGTAGCTCTCGCAAGCACTCATTAGATGTGTATAAGAGACAG  
NanP\_tn5\_v1\_093 ATCGTAGCTGAATCTGCGGAACTAAAGATGTGTATAAGAGACAG

|                 |                                              |
|-----------------|----------------------------------------------|
| NanP_tn5_v1_094 | ATCGTAGCTGCACCGTCGAGTTCTAAGATGTGTATAAGAGACAG |
| NanP_tn5_v1_095 | ATCGTAGCTGCTCCTTGTGACGGTAAGATGTGTATAAGAGACAG |
| NanP_tn5_v1_096 | ATCGTAGCTGTAAGTCATAGCAACGAGATGTGTATAAGAGACAG |
| NanP_tn5_v1_097 | ATCGTAGCTGTTGCATTGAGGTGGTAGATGTGTATAAGAGACAG |
| NanP_tn5_v1_098 | ATCGTAGCTTAGCCTGCAACAAGAAAGATGTGTATAAGAGACAG |
| NanP_tn5_v1_099 | ATCGTAGCTTCCGCATTAGCTGACCAGATGTGTATAAGAGACAG |
| NanP_tn5_v1_100 | ATCGTAGCTTGACAGGTGAACGTGCAGATGTGTATAAGAGACAG |



**Table S2.** Primer and barcode sequences for the Tn5 V2 approach.

| <b>Name</b>     | <b>Sequence</b>                                        |
|-----------------|--------------------------------------------------------|
| NanP_tn5_v2_001 | ACTGAAACAACAACAACCCTACGCCGGTGAATAGATGTGTATAAGAGACAG    |
| NanP_tn5_v2_002 | ACTGACCACCACTTGTTCACCTAGTAACCGGAGATGTGTATAAGAGACAG     |
| NanP_tn5_v2_003 | ACTGAGGACAAGTGGTGGCGGTAGGTGTTCATAGATGTGTATAAGAGACAG    |
| NanP_tn5_v2_004 | ACTGACCTGAGAGATGCTATCGCCGGAAGTTGAGATGTGTATAAGAGACAG    |
| NanP_tn5_v2_005 | ACTGAGAGTAGTAACCAAGATTGATGTTGTGCAGATGTGTATAAGAGACAG    |
| NanP_tn5_v2_006 | ACTGACAGTCCTAGATGAACCAGTGTGTGTAGATGTGTATAAGAGACAG      |
| NanP_tn5_v2_007 | ACTGATTGATTGAACCGCAGTCTACGTGCCTAGATGTGTATAAGAGACAG     |
| NanP_tn5_v2_008 | ACTGAAAGTGCCATTAGAAGTCTATAACGAAGGAGATGTGTATAAGAGACAG   |
| NanP_tn5_v2_009 | ACTGAGAAGCATCAATCGCTAATAACCGTACCAGATGTGTATAAGAGACAG    |
| NanP_tn5_v2_010 | ACTGAAACCAATTAGTCCACGTGAAGCATACCAGATGTGTATAAGAGACAG    |
| NanP_tn5_v2_011 | ACTGAGCTACCACCTTCCCCTCTGACAAGCGTAGATGTGTATAAGAGACAG    |
| NanP_tn5_v2_012 | ACTGATGGAGTATCTGAAGTAATGACAAGCCGAGATGTGTATAAGAGACAG    |
| NanP_tn5_v2_013 | ACTGAGCCAACCGGACTAAATCGTTCATGTGCAGATGTGTATAAGAGACAG    |
| NanP_tn5_v2_014 | ACTGAAACCGACCAATGAACTCCGAATGTCAAAGATGTGTATAAGAGACAG    |
| NanP_tn5_v2_015 | ACTGAACGCGCTTATATTCCTACCTCCATTAAAGATGTGTATAAGAGACAG    |
| NanP_tn5_v2_016 | ACTGAAGTGATAACGTACGTAGGAAGACCGCTAGATGTGTATAAGAGACAG    |
| NanP_tn5_v2_017 | ACTGAACAGCCAACGTAACATACCGGAATCTTAGATGTGTATAAGAGACAG    |
| NanP_tn5_v2_018 | ACTGAATCCTTCCAACAACCAGAACCACCAATAGATGTGTATAAGAGACAG    |
| NanP_tn5_v2_019 | ACTGACCAGTAGCGCCTTTCCAAGCAACCAGTAGATGTGTATAAGAGACAG    |
| NanP_tn5_v2_020 | ACTGAGATATTAAGGACCAACACCAGCGCCTAAGATGTGTATAAGAGACAG    |
| NanP_tn5_v2_021 | ACTGAAACATGCGGTGCGGTTCCACTTGATAGAGATGTGTATAAGAGACAG    |
| NanP_tn5_v2_022 | ACTGAACTAACCAGAGGAAACCGCCAGTGAGAAGATGTGTATAAGAGACAG    |
| NanP_tn5_v2_023 | ACTGATTGCGTTACTAGGAGCCAACTACAATGAGATGTGTATAAGAGACAG    |
| NanP_tn5_v2_024 | ACTGACCGGTGTTGTTATGCTATATGTGCCAGATGTGTATAAGAGACAG      |
| NanP_tn5_v2_025 | ACTGACCTAGTGTTAATCATTGAGGAACCATCAGATGTGTATAAGAGACAG    |
| NanP_tn5_v2_026 | ACTGAACGCACCACACCACACTAACAATTCCGAGATGTGTATAAGAGACAG    |
| NanP_tn5_v2_027 | ACTGAACGAGAAGATAAGTTGTAACCTAACGGAGATGTGTATAAGAGACAG    |
| NanP_tn5_v2_028 | ACTGAGAGGTACTGTGCACTTGCAGTTGTAGGAGATGTGTATAAGAGACAG    |
| NanP_tn5_v2_029 | ACTGACACCTTCTCCAGCACCAGAGGAACGGAAGATGTGTATAAGAGACAG    |
| NanP_tn5_v2_030 | ACTGACCATAAGACAACCGAATGCTAGGATCTAGATGTGTATAAGAGACAG    |
| NanP_tn5_v2_031 | ACTGAGTGGACAAGCAGACTATATCGCGCCGTAGATGTGTATAAGAGACAG    |
| NanP_tn5_v2_032 | ACTGAGCGCCTTGGTGTTCGTAAGTTCGACCGAGATGTGTATAAGAGACAG    |
| NanP_tn5_v2_033 | ACTGAATGCCGCCGAAGAACAATACTCACTCACGAAGATGTGTATAAGAGACAG |
| NanP_tn5_v2_034 | ACTGAAACCACGGAGCACAACCGCGGTATGACTAGATGTGTATAAGAGACAG   |
| NanP_tn5_v2_035 | ACTGAACAGTGAATACAGCGTTCTATTGTGTGAGATGTGTATAAGAGACAG    |
| NanP_tn5_v2_036 | ACTGAAAGAGTTATCGCACCAGACCTTGCTAAAGATGTGTATAAGAGACAG    |
| NanP_tn5_v2_037 | ACTGATTAGCCTTGTCTTCAATGTGCGCACGGAAGATGTGTATAAGAGACAG   |
| NanP_tn5_v2_038 | ACTGAAGTTCGTTCTGCGAATAGTCATACCGGAGATGTGTATAAGAGACAG    |
| NanP_tn5_v2_039 | ACTGAACTGTTGCGTTAAGCCTCGATCAGAAGAGATGTGTATAAGAGACAG    |
| NanP_tn5_v2_040 | ACTGAGATGGATTGATTCAGTTCCGTTGCCTAGATGTGTATAAGAGACAG     |
| NanP_tn5_v2_041 | ACTGATGCCGACACTCTTCCATATTCTAGCTCAGATGTGTATAAGAGACAG    |
| NanP_tn5_v2_042 | ACTGACAGCTCGTGCGTATTGAGTCCATTAGGAGATGTGTATAAGAGACAG    |

NanP\_tn5\_v2\_043 ACTGATCAGTTGGTAGCCGTGCAGGAAGTAAGAGATGTGTATAAGAGACAG  
NanP\_tn5\_v2\_044 ACTGAGTATTGCTAACTGAGCCATATTGAACCAGATGTGTATAAGAGACAG  
NanP\_tn5\_v2\_045 ACTGAAACCTAGCTTCATAACCGCTGCTAACAAGATGTGTATAAGAGACAG  
NanP\_tn5\_v2\_046 ACTGAATATCCTCATTCCAATCAGCGGACCTTAGATGTGTATAAGAGACAG  
NanP\_tn5\_v2\_047 ACTGAAACCGGAGTGAAGTGTATGGACCTTCAGATGTGTATAAGAGACAG  
NanP\_tn5\_v2\_048 ACTGAACATCCGCGCACTAGACTCCGCTTGGTAGATGTGTATAAGAGACAG  
NanP\_tn5\_v2\_049 ACTGACAAGTGTGTGAGAGTCCACTAATCTTGAGATGTGTATAAGAGACAG  
NanP\_tn5\_v2\_050 ACTGATAATAGAACGACGCTCCTCGTAGTCCTAGATGTGTATAAGAGACAG  
NanP\_tn5\_v2\_051 ACTGAACATGACGTATTGTATCCATGCCAACAAAGATGTGTATAAGAGACAG  
NanP\_tn5\_v2\_052 ACTGACGTGCGAGGATAAGTCTAATCACCGCGAGATGTGTATAAGAGACAG  
NanP\_tn5\_v2\_053 ACTGACTTAATTGCCACATAAGATTGTCCTCGAGATGTGTATAAGAGACAG  
NanP\_tn5\_v2\_054 ACTGAAATCGAGTACCATGGTCTGTACTGCGAAGATGTGTATAAGAGACAG  
NanP\_tn5\_v2\_055 ACTGAGAGTCCAACAGCAGCCGGATTGGATAAAGATGTGTATAAGAGACAG  
NanP\_tn5\_v2\_056 ACTGATCCGCGTTGTACCCGGAGTTATATTGGAGATGTGTATAAGAGACAG  
NanP\_tn5\_v2\_057 ACTGACTCACGCATATCCAACCGAATACCTTGAGATGTGTATAAGAGACAG  
NanP\_tn5\_v2\_058 ACTGAAATAGCATACTGGGCGAAGACGATGACAGATGTGTATAAGAGACAG  
NanP\_tn5\_v2\_059 ACTGACCAATTCGGAGGAGGACAGTGGATCAAAGATGTGTATAAGAGACAG  
NanP\_tn5\_v2\_060 ACTGAAACGATATAGGACCTGTACCTCCTCGAAGATGTGTATAAGAGACAG  
NanP\_tn5\_v2\_061 ACTGAGCACAAGAACATTGAACCTTAGAATGGAGATGTGTATAAGAGACAG  
NanP\_tn5\_v2\_062 ACTGAACGATTGCGAGCCGCTGCTACCTACGAAGATGTGTATAAGAGACAG  
NanP\_tn5\_v2\_063 ACTGACCATCTTGAGCTAATTATCCAGCGAGAGATGTGTATAAGAGACAG  
NanP\_tn5\_v2\_064 ACTGAGCTGTGAACGATCTGACCACATAGACTAGATGTGTATAAGAGACAG  
NanP\_tn5\_v2\_065 ACTGAACCGAACGACCATAAGAGTATCGCCACAGATGTGTATAAGAGACAG  
NanP\_tn5\_v2\_066 ACTGACCTAATATACAGCACACAGTTACGTCAGATGTGTATAAGAGACAG  
NanP\_tn5\_v2\_067 ACTGAAAGGTCCGATGAGTGTTCCTCAAGATGAGATGTGTATAAGAGACAG  
NanP\_tn5\_v2\_068 ACTGAACCACAAGTTACCCATATAGGTGCATCAGATGTGTATAAGAGACAG  
NanP\_tn5\_v2\_069 ACTGATGTATCTCCGTTCCCAACAAGGACCACAGATGTGTATAAGAGACAG  
NanP\_tn5\_v2\_070 ACTGACCTCCATAGCAAGTACTGGACGAGCACAGATGTGTATAAGAGACAG  
NanP\_tn5\_v2\_071 ACTGAACAAGAGACGCAAAACATCCACCGTCGTAGATGTGTATAAGAGACAG  
NanP\_tn5\_v2\_072 ACTGACATCGGAACGCTCGCTAATCCATATCCAGATGTGTATAAGAGACAG  
NanP\_tn5\_v2\_073 ACTGATATGTTGCAATCCAGTCTCATAGCGGAGATGTGTATAAGAGACAG  
NanP\_tn5\_v2\_074 ACTGACGCAATGATGATAGTAACTATGCCTTCAGATGTGTATAAGAGACAG  
NanP\_tn5\_v2\_075 ACTGAACATATCTGCAACTCGTGCTGCCTGTTAGATGTGTATAAGAGACAG  
NanP\_tn5\_v2\_076 ACTGATTGTGCGCCGACTGGAGTTACACCTATAGATGTGTATAAGAGACAG  
NanP\_tn5\_v2\_077 ACTGAGGATTCACACGGTATAAGACAGTGACCAGATGTGTATAAGAGACAG  
NanP\_tn5\_v2\_078 ACTGAAGAACATAACAGGGCACAACGAGCTATAGATGTGTATAAGAGACAG  
NanP\_tn5\_v2\_079 ACTGACTACTAACGAACCTCCGTGAGGTAGGTAGATGTGTATAAGAGACAG  
NanP\_tn5\_v2\_080 ACTGAGCATGAGACCTGTCTATCTCGTTATGGAGATGTGTATAAGAGACAG  
NanP\_tn5\_v2\_081 ACTGAAATACGACAGCGGAAGAACAACACTGCGCTAGATGTGTATAAGAGACAG  
NanP\_tn5\_v2\_082 ACTGATATACCGCCGCTTCGGTCTTCCTAACAGATGTGTATAAGAGACAG  
NanP\_tn5\_v2\_083 ACTGATTACGGTGGAACACGACAGCGGTAATAGATGTGTATAAGAGACAG  
NanP\_tn5\_v2\_084 ACTGAGGTGGAACCTCATCTAGGAGGTGGAGATGTGTATAAGAGACAG  
NanP\_tn5\_v2\_085 ACTGAAGCCACCGTCGTATAAGGACGTTGCGGAGATGTGTATAAGAGACAG  
NanP\_tn5\_v2\_086 ACTGATGCTTATTACTGCAATAGCAAGTTCGCAGATGTGTATAAGAGACAG  
NanP\_tn5\_v2\_087 ACTGACCTTCAGATTACTGCTTGTAGTTCCGCAGATGTGTATAAGAGACAG  
NanP\_tn5\_v2\_088 ACTGAATGGTTCCTCCGCGTATTCGTGGTAAGAGATGTGTATAAGAGACAG  
NanP\_tn5\_v2\_089 ACTGATGAAGGACACACACAGGTGATCACAAGATGTGTATAAGAGACAG  
NanP\_tn5\_v2\_090 ACTGAGAATAATGTGCGGAGACAATTCCGTAACAGATGTGTATAAGAGACAG  
NanP\_tn5\_v2\_091 ACTGACCGCGTGCTCTTATGCTTGACCGCCTTAGATGTGTATAAGAGACAG  
NanP\_tn5\_v2\_092 ACTGAGAGAACTATTGAGTTCAACAACCTGGAGAGATGTGTATAAGAGACAG  
NanP\_tn5\_v2\_093 ACTGACCAGAACGGTGAACGAAGGAGTTGTACAGATGTGTATAAGAGACAG

|                 |                                                     |
|-----------------|-----------------------------------------------------|
| NanP_tn5_v2_094 | ACTGAAAGCGCCTGTCCTAACACCGTACAGGAAGATGTGTATAAGAGACAG |
| NanP_tn5_v2_095 | ACTGATGACCACGCATACACAACATACTGCTCAGATGTGTATAAGAGACAG |
| NanP_tn5_v2_096 | ACTGACGCTTCTCGTCTAACAGTCGAAGAGCAGATGTGTATAAGAGACAG  |

**Table S3.** Cost analysis of Circuit-seq with Tn5 approach.

Cost of a 96-well run

| Item               | Bulk cost (\$) | # runs | Per run cost (\$) |
|--------------------|----------------|--------|-------------------|
| Flongle            | 810            | 12     | 67.5              |
| LSK110-kit         | 599            | 12     | 49.92             |
| End Repair         | 250            | 48     | 5.21              |
| FFPE               | 165            | 48     | 3.44              |
| Quick Ligase       | 388            | 30     | 12.93             |
| Tn5                | 2000           | 1333   | 1.5               |
| Barcodes           | 440            | 1000   | 0.44              |
| Total cost per run |                |        | 140.94            |

**Table S4.** Primer sequences for Restriction Enzyme approach.

| primer     | barcode_sequence<br>(reverse complement) | full sequence (5' -> 3')                                                                       |
|------------|------------------------------------------|------------------------------------------------------------------------------------------------|
| common_fwd | AACAACAACCAACAAGGTGG                     | CAAGTGCACCTCGAGGAATTCTCTAGAGCTAGCTGATCA<br>GAGCTCGTCCGATACTACATTCCGGAACGTAACACGAGC<br>TGGAACGA |
| rev_1      | AACCGATTCCAACCTCTCGCC                    | CCTAAGAAGGACAGCACGTCCCACCTTGTTGGTTGTTG<br>TTTCGTTCCAGCTCGTGTTACG                               |
| rev_2      | AAGACTGAGAAATGGTAACG                     | CCTAAGAAGGACAGCACGTCCGCGAGAGTTGGAATCGG<br>TTTCGTTCCAGCTCGTGTTACG                               |
| rev_3      | ACAGTTATGCACCGCAAGAC                     | CCTAAGAAGGACAGCACGTCCGTTACCATTTCTCAGTC<br>TTTCGTTCCAGCTCGTGTTACG                               |
| rev_4      | ACGCCTCTTAAGCTACCATG                     | CCTAAGAAGGACAGCACGTCTTGCAGGTCATAACT<br>GTTTCGTTCCAGCTCGTGTTACG                                 |
| rev_5      | AGGAATTGCCAGTGTGGTCC                     | CCTAAGAAGGACAGCACGTCCATGGTAGCTTAAGAGGC<br>GTTTCGTTCCAGCTCGTGTTACG                              |
| rev_6      | CCACCTTGTTGGTTGTTGTT                     | CCTAAGAAGGACAGCACGTCCGACCACACTGGCAATTC<br>CTTCGTTCCAGCTCGTGTTACG                               |

**Table S5.** Addgene plasmid identifiers for the plasmids used in our simulated contamination experiments.

| addgene_id | Used_as_standard |
|------------|------------------|
| 1015       | -                |
| 27340      | -                |
| 47504      | -                |
| 52535      | -                |
| 32751      | -                |
| 12298      | -                |
| 10953      | -                |
| 71720      | -                |
| 14080      | -                |
| 64073      | -                |
| 48140      | -                |
| 18110      | -                |
| 104991     | -                |
| 11427      | -                |
| 14723      | -                |
| 32515      | -                |
| 45161      | -                |
| 21232      | -                |
| 52925      | -                |
| 8454       | -                |
| 24595      | -                |
| 12260      | -                |
| 8381       | -                |
| 50473      | -                |
| 68122      | -                |
| 37120      | -                |
| 31485      | -                |
| 45605      | -                |
| 21915      | -                |
| 47327      | -                |
| 20737      | -                |
| 11908      | -                |
| 16542      | -                |
| 57822      | -                |
| 61463      | -                |
| 10808      | -                |
| 10878      | -                |
| 29435      | -                |
| 66801      | -                |

|        |      |
|--------|------|
| 31815  | TRUE |
| 47549  | -    |
| 48139  | -    |
| 16337  | TRUE |
| 36412  | -    |
| 49172  | -    |
| 12251  | TRUE |
| 35175  | -    |
| 59946  | -    |
| 12301  | -    |
| 26722  | -    |
| 43796  | -    |
| 52963  | -    |
| 62988  | -    |
| 31367  | -    |
| 40729  | -    |
| 66810  | -    |
| 47443  | -    |
| 87360  | -    |
| 14129  | -    |
| 36325  | -    |
| 73501  | -    |
| 36939  | -    |
| 12253  | -    |
| 70219  | -    |
| 60415  | -    |
| 20960  | -    |
| 52961  | TRUE |
| 26678  | -    |
| 26646  | -    |
| 81070  | -    |
| 22945  | -    |
| 39196  | -    |
| 75127  | -    |
| 51692  | -    |
| 65974  | -    |
| 12259  | -    |
| 11181  | -    |
| 27052  | -    |
| 49792  | TRUE |
| 80925  | -    |
| 110060 | -    |
| 14873  | -    |
| 14436  | -    |
| 48138  | -    |
| 8449   | -    |
| 63890  | -    |
| 35617  | -    |
| 42230  | -    |

|        |   |
|--------|---|
| 1864   | - |
| 83467  | - |
| 40342  | - |
| 1654   | - |
| 11916  | - |
| 52213  | - |
| 30313  | - |
| 107177 | - |
